# Supplementary material for: Provider-initiated HIV testing and TB screening in the era of universal coverage: Are the right people being reached? A cohort study in Blantyre, Malawi
Source: PLoS One. 2020 Aug 13;15(8):e0236407. doi: 10.1371/journal.pone.0236407 (PMC7425889; doi:10.1371/journal.pone.0236407)
Supplement: S1 Questionnaire — (XLSX) [file pone.0236407.s001.xlsx]

## Sheet: ion - A Eligibility and consent
question_id	label	translations	type	repeat	group	option_labels	option_values	calculate	relevant	constraint	required	comment	default_value	load_properties	save_properties
/data/a0030_sex	Are you male or female?	{'en': 'Are you male or female?', 'nya': 'Kodi ndinu mwamuna kapena Mkazi?'}	Select			Male Female	Male, Female				true				case - Sex
/data/a0020_age	What is your current age in years?	{'en': 'What is your current age in years?', 'nya': 'Kodi padakali pano muli ndi zaka zingati?'}	Int							. < 100	true				case - name case - Age
/data/a0011_agreesimprints	Did participant agree to have fingerprints captured?	{'en': 'Did participant agree to have fingerprints captured?', 'nya': 'Did participant agree to have fingerprints captured?'}	Select			Yes No	Yes, No				true
/data/a0040_cgh	Do you have a cough now?	{'en': 'Do you have a cough now?', 'nya': 'kodi panopa mukukhosomola?'}	Select			Yes No	Yes, No		/data/a0011_agreesimprints = 'Yes'		true				case - a0040_cgh
/data/a0041_cghdur	How long have you been coughing? If less than 12 months, answer must be recorded in days, weeks or months. If 12 months (1 year or more) answer must be recorded in years)	{'en': 'How long have you been coughing? \n\nIf less than 12 months, answer must be recorded in days, weeks or months. If 12 months (1 year or more) answer must be recorded in years)', 'nya': 'Kodi mwakhosomola kwa nthawi yayitali bwanji? \n\nIf less than 12 months, answer must be recorded in days, weeks or months. If 12 months (1 year or more) answer must be recorded in years)'}	Int						/data/a0040_cgh = 'Yes'		true	Units (days, weeks, months or years will be entered on next screen)			case - a0041_cghdur
/data/a0042_cghunits	Units of cough duration	{'en': 'Units of cough duration', 'nya': 'Units of cough duration'}	Select			Days Weeks Months Years	Days, Weeks, Months, Years		/data/a0040_cgh = 'Yes'		true				case - a0042_cghunits
/data/a0050_lw	Have you been losing weight?	{'en': 'Have you been losing weight?', 'nya': 'Kodi mukutsika sikelo?'}	Select			Yes No	Yes, No		/data/a0011_agreesimprints = 'Yes'		true				case - a0050_lw
/data/a0060_ns	Do you have night sweats?	{'en': 'Do you have night sweats?', 'nya': 'Kodi mumatuluka thukuta usiku?'}	Select			Yes No	Yes, No		/data/a0011_agreesimprints = 'Yes'		true				case - a0060_ns
/data/a0070_fev	Do you have fever or hot body?	{'en': 'Do you have fever or hot body?', 'nya': 'Kodi mukumatentha thupi?'}	Select			Yes No	Yes, No		/data/a0011_agreesimprints = 'Yes'		true				case - a0070_fev
/data/a0090_rx	Are you on TB treatment? By TB treatment I mean registered at one of the TB clinics and receiving 6-8 months of treatment with a TB card?	{'en': 'Are you on TB treatment? By TB treatment I mean registered at one of the TB clinics and receiving 6-8 months of treatment with a TB card?', 'nya': 'kodi mukumwa mankhwala a chifuwa chachikulu (TB)? \n\nBy TB treatment I mean registered at one of the TB clinics and receiving 6-8 months of treatment with a TB card?'}	Select			Yes No	Yes, No		/data/a0081_elig1 = "TRUE"		true				case - a0090_rx
/data/a0100_rx6m	Have you taken treatment for TB in the last 6-months	{'en': 'Have you taken treatment for TB in the last 6-months', 'nya': 'Kodi mumalandira chithandizo cha chifuwa chachikulu mu miyezi isanu ndi umodzi yapitNo?'}	Select			Yes No	Yes, No		/data/a0081_elig1 = "TRUE"		true				case - a0100_rx6m
/data/a0110_ipt	Are you currently taking isoniazid preventive therapy?	{'en': 'Are you currently taking isoniazid preventive therapy?', 'nya': 'Kodi padakali pano mukumwa mankhwala a isoniazid preventive therapy (IPT)?'}	Select			Yes No	Yes, No		/data/a0081_elig1 = "TRUE"		true				case - a0110_ipt
/data/a0120_res	Do you live in Blantyre?	{'en': 'Do you live in Blantyre?', 'nya': 'Kodi mumakhala mumzinda wa Blantyre?'}	Select			Yes No	Yes, No		/data/a0081_elig1 = "TRUE"		true				case - a0120_res
/data/a0130_out	Do you plan to move out of Blantyre to live elsewhere in the next 6-months?	{'en': 'Do you plan to move out of Blantyre to live elsewhere in the next 6-months?', 'nya': 'Kodi muli ndi lingaliro losamuka mumzinda wa Blantyre ndikukhala kwina mumiyezi isanu ndi umodzi ikudzNo?'}	Select			Yes No	Yes, No		/data/a0081_elig1 = "TRUE"		true				case - a0130_out

## Sheet: t interview (Quality assurance)
question_id	label	translations	type	repeat	group	option_labels	option_values	calculate	relevant	constraint	required	comment	default_value	load_properties	save_properties
/data/q0090_prevtb	Have you ever taken treatment for tuberculosis previously?	{'en': 'Have you ever taken treatment for tuberculosis previously?', 'nya': 'Kodi munayamba mwalandilapo chithandizo cha mankhwala a chifuwa chachikulu (TB)?'}	Select			Yes No	Yes, No				true
/data/q0100_ever	Have you ever been tested for HIV?	{'en': 'Have you ever been tested for HIV?', 'nya': 'Kodi munayamba mwayezetsako HIV?'}	Select			Yes No	Yes, No				true
/data/q0110_numtest	In the last 12 months, how many times have you tested for HIV	{'en': 'In the last 12 months, how many times have you tested for HIV', 'nya': 'Pa miyezi 12 yapitayi, kodi mwayezetsa HIV kangati?'}	Int							. < 10	true
/data/q0120_lasttest	You don't have to tell me if you don't want, but what was the result of your last HIV test?	{'en': "You don't have to tell me if you don't want, but what was the result of your last HIV test?", 'nya': 'Kodi zotsatira zakuyezedwa kwanu komaliza zinali zotani? Muli ndi ufulu ondiuza kapena ayi?'}	Select			Positive Negative Don't know Don't want to reveal Never tested	Positive, Negative, Dont_know, Dont_want_to_reveal, Nevertested				true
/data/q0130_hivstatus	Have you ever had a positive HIV test?	{'en': 'Have you ever had a positive HIV test?', 'nya': 'Kodi munayamba mwayezetsapo ndikupezeka ndi HIV?'}	Select			Yes No	Yes, No				true
/data/q0140_art	Are you currently taking ART drugs?	{'en': 'Are you currently taking ART drugs?', 'nya': 'Kodi panopa mukumwa ma ARV?'}	Select			Yes No	Yes, No				true
/data/q0150_text	Now I want to ask you some questions about what happened during your visit to the clinic today	{'en': 'Now I want to ask you some questions about what happened during your visit to the clinic today', 'nya': 'Tsopano ndikufunsani mafunso a zomwe zachitika kuchipatala kuno lero'}	Trigger								false
/data/q0160_seen	Were you seen by a clinic health worker today? (NURSE, CLINICIAN, DOCTOR etc ... NOT PROSPECT STUDY FIELDWORKER!)	{'en': 'Were you seen by a clinic health worker today?\n\n(NURSE, CLINICIAN, DOCTOR etc ... NOT PROSPECT STUDY FIELDWORKER!)', 'nya': 'Kodi mwakumana ndi a dotolo lero?'}	Select			Yes No	Yes, No				true
/data/q0170_askcgh	Did the health worker ask you if you had a cough today? (NURSE, CLINICIAN, DOCTOR... NOT PROSPECT STUDY FIELDWORKER)	{'en': 'Did the health worker ask you if you had a cough today?\n\n(NURSE, CLINICIAN, DOCTOR... NOT PROSPECT STUDY FIELDWORKER)', 'nya': 'Kodi a dotolowa anakufunsani ngati mukukhosomola?'}	Select			Yes No	Yes, No				true
/data/q0260_askhiv	Were you offered a test for HIV today? (BY NURSE, CLINICIAN, DOCTOR... NOT PROSPECT STUDY FIELDWORKER!)	{'en': 'Were you offered a test for HIV today?\n\n(BY NURSE, CLINICIAN, DOCTOR... NOT PROSPECT STUDY FIELDWORKER!)', 'nya': 'Kodi munapatsidwa mwayi oyezetsa HIV lero?'}	Select			Yes No	Yes, No				true
/data/q0270_testedhiv	Did you do a test for HIV today? (BY NURSE, CLINICIAN, DOCTOR... NOT PROSPECT STUDY FIELDWORKER)	{'en': 'Did you do a test for HIV today?\n\n(BY NURSE, CLINICIAN, DOCTOR... NOT PROSPECT STUDY FIELDWORKER)', 'nya': 'Kodi munayezetsa HIV lero?'}	Select			Yes No	Yes, No				true
/data/q0280_toldhivres	Were you told the result of your HIV test today? (BY NURSE, CLINICIAN, DOCTOR... NOT PROSPECT STUDY FIELDWORKER)	{'en': 'Were you told the result of your HIV test today?\n\n(BY NURSE, CLINICIAN, DOCTOR... NOT PROSPECT STUDY FIELDWORKER)', 'nya': 'Kodi munawuzidwa zotsatira za kuyezetsa HIV lero?'}	Select			Yes No	Yes, No				true
/data/q0290_toldart	Were you told you needed to start treatment for HIV? (BY NURSE, CLINICIAN, DOCTOR... NOT PROSPECT STUDY FIELDWORKER)	{'en': 'Were you told you needed to start treatment for HIV?\n\n(BY NURSE, CLINICIAN, DOCTOR... NOT PROSPECT STUDY FIELDWORKER)', 'nya': 'Kodi munawuzidwa kuti mukuyenera kuyamba kulandira chithandizo cha mankhwala a HIV?'}	Select			Yes No	Yes, No				true
/data/q0300_artstart	Did you start treatment for HIV (ART) today?	{'en': 'Did you start treatment for HIV (ART) today?', 'nya': 'Kodi mwayamba kulandila chithandizo cha mankhwala a HIV (ART) lero?'}	Select			Yes No	Yes, No				true
/data/q0310_srh	How do you rate your general health?	{'en': 'How do you rate your general health?', 'nya': 'How do you rate your general health?'}	Select			Very good Good Fair Poor Very poor	very_good, Good, Fair, Poor, very_poor				true
